# Supplementary material for: Anaerobic oxidation of propane coupled to nitrate reduction by a lineage within the class Symbiobacteriia
Source: PubMed Central journal article supplement (PMC9576796; doi:10.1038/s41467-022-33872-y), 2022-10-17
Supplement: 41467_2022_33872_MOESM2_ESM.pdf [file 41467_2022_33872_MOESM2_ESM.pdf]

## **Description of Additional Supplementary Files:**

**Supplementary Data 1** | Key features of the metagenome (short-read and long-read sequencing) and metatranscriptome datasets generated for the enrichment culture, and the 59 draft genomes recovered from the metagenomic data ( $\geq 70\%$  completeness and  $\leq 10\%$  contamination). Assessments of the genomes were based on the CheckM program.

**Supplementary Data 2** | Genes encoding enzymes for propane activation and complete oxidation in '*Ca. A. nitratireducens*'.
